# Supplementary material for: MicroRNA 483-3p targets Pard3 to potentiate TGF-β1-induced cell migration, invasion, and epithelial–mesenchymal transition in anaplastic thyroid cancer cells
Source: PubMed Central journal article supplement (PMC6756112; doi:10.1038/s41388-018-0447-1), 2018-08-31
Supplement: 41388_2018_447_MOESM1_ESM.pdf [file 41388_2018_447_MOESM1_ESM.pdf]

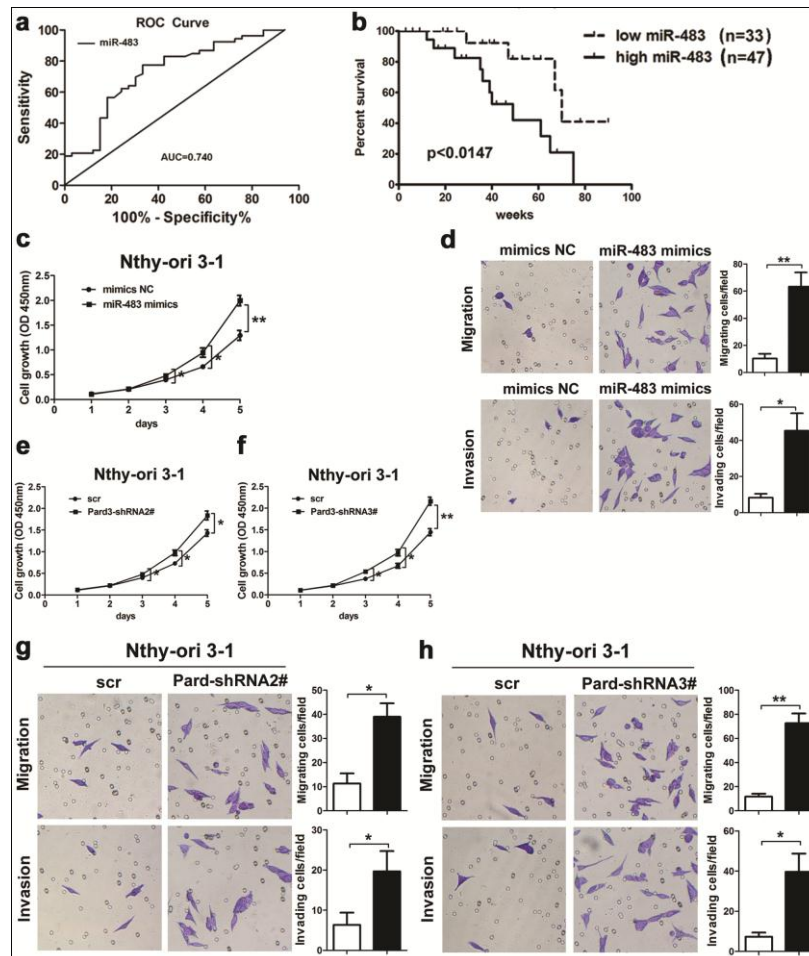

**Supplementary Figure 1.** High MiR-483 decreases lower survival in patients and increases normal cell growth, migration and invasion and Pard3 knockdown increases normal thyroid cell growth, migration and invasion. **(a)** Receiver operating characteristics (ROC) curve analyzed miR-483 in thyroid cancer tissues. MiR-483 yielded an AUC (the areas under the ROC curve) of 0.740 (95 % CI 0.631–0.850;  $p = 0.002$ ). **(b)** Kaplan–Meier analyzed the relationship of miR-483 expression and survival of thyroid cancer patients. ( $*p < 0.0147$ , Log-rank test). Nthy-ori 3-1 cells were transfected with mimics NC and miR-483 mimics, or scr and Pard-shRNA2#/3#, respectively. **(c, e, f)** Cell growth was determined by the CCK-8 assay ( $*p < 0.05$ ,  $**p < 0.01$ , one-way ANOVA). **(d, g, h)** Cell migration and invasion were assessed by Transwell assays ( $*p < 0.05$ ,  $**p < 0.01$ , Student’s  $t$ -test).  $N = 3$  independent experiments with triplicate biological replicates for each line.
