# Supplementary material for: MicroRNA 483-3p targets Pard3 to potentiate TGF-β1-induced cell migration, invasion, and epithelial–mesenchymal transition in anaplastic thyroid cancer cells
Source: PubMed Central journal article supplement (PMC6756112; doi:10.1038/s41388-018-0447-1), 2018-08-31
Supplement: 41388_2018_447_MOESM2_ESM.pdf [file 41388_2018_447_MOESM2_ESM.pdf]

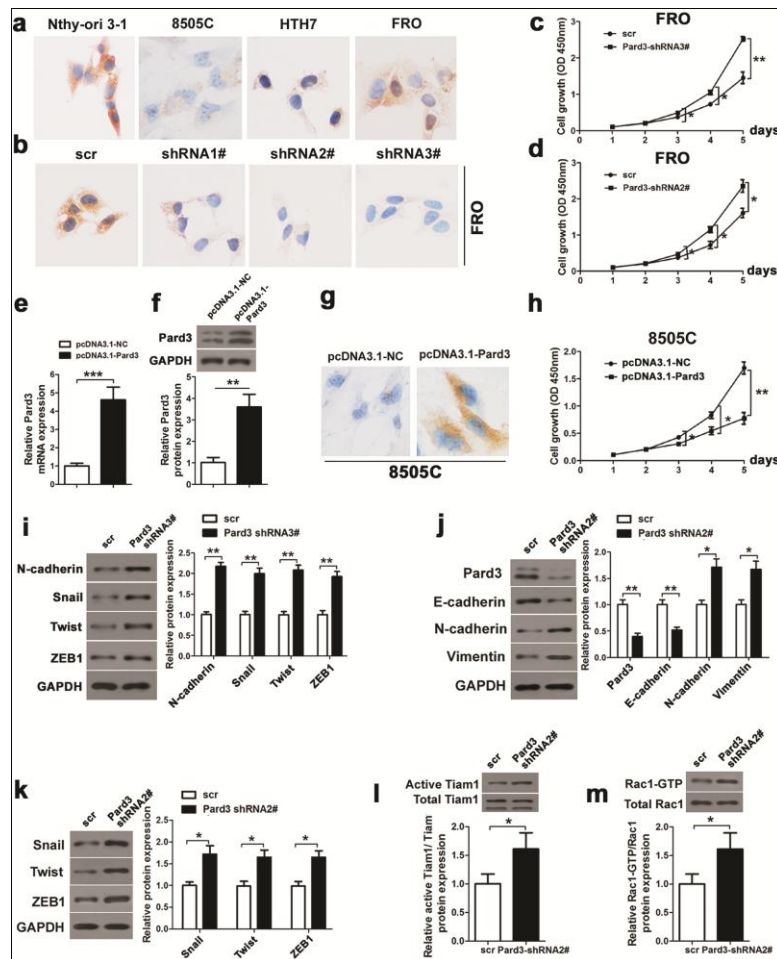

**Supplementary Figure 2.** Knockdown of Pard3 activates EMT expression. **(a)** The expression of Pard3 by IHC analysis in cell lines normal thy-ori 3-1, 8505C, HTH7, and FRO cells. **(b)** The expression of Knockdown of Pard3 (Pard3 shRNA1#–3#) in FRO cells was analyzed by IHC. **(c, d)** FRO cells were transfected with Pard3-shRNA2# or shRNA-3# or scr. Cell growth was determined by the CCK-8 assay (\* $p < 0.05$ , \*\* $p < 0.01$ , one-way ANOVA). **(e, f)** Overexpression of Pard3 (pcDNA3.1-Pard3) was detected by qRT-PCR and western blot analysis in 8505C cells (\*\* $p < 0.01$ , \*\*\*  $p < 0.001$ , Student's  $t$ -test). **(g)** The expression of overexpression of Pard3 (pcDNA3.1-Pard3) in 8505C cells was analyzed by IHC. **(h)** 8505C cells were transfected with pcDNA3.1-Pard3 or pcDNA3.1-NC. Cell growth was determined by the CCK-8 assay (\* $p < 0.05$ , \*\* $p < 0.01$ , one-way ANOVA). **(i)** FRO cells were stably transfected with Pard3-shRNA3# or scr. N-cadherin, Snail, Twist and ZEB1 expression were detected by western blot. GAPDH was used as a loading control (\*\* $p < 0.01$ , Student's  $t$ -test). **(j-m)** FRO cells were stably transfected with Pard3-shRNA2# or scr. E-cadherin, Vimentin, N-cadherin, Snail, Twist and ZEB1, active Tiam1 and Rac1 expression were detected by western blot. GAPDH was used as a loading control (\* $p < 0.05$ , \*\* $p < 0.01$ , Student's  $t$ -test). N = 3 independent experiments with triplicate biological replicates for each line.
