# Supplementary material for: MicroRNA 483-3p targets Pard3 to potentiate TGF-β1-induced cell migration, invasion, and epithelial–mesenchymal transition in anaplastic thyroid cancer cells
Source: PubMed Central journal article supplement (PMC6756112; doi:10.1038/s41388-018-0447-1), 2018-08-31
Supplement: 41388_2018_447_MOESM4_ESM.pdf [file 41388_2018_447_MOESM4_ESM.pdf]

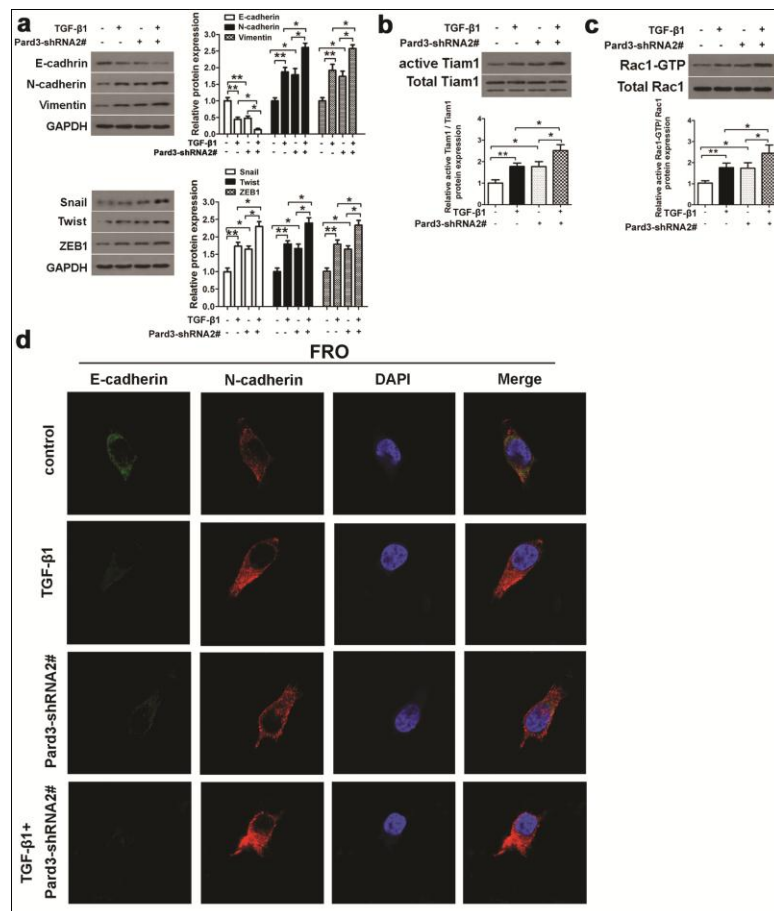

**Supplementary Figure 4.** Knockdown by Pard3-shRNA2# increases TGF-β1 induced ATC EMT and Tiam1/Rac1 signaling. FRO cells were transfected with Pard3 shRNA2#, and subsequently treated with TGF-β1 (10 ng/ml) for 48 h. Untransfected cells with or without TGF-β1 treatment were also included. **(a-c)** E-cadherin, N-cadherin, Vimentin, Snail, Twist and ZEB1, active Tiam1 and Rac1 expression were detected by western blotting. GAPDH was used as a loading control ( $*p < 0.05$ ,  $**p < 0.01$ , one-way ANOVA). **(d)** E-cadherin and N-cadherin expression in FRO was detected by immunofluorescence.  $N = 3$  independent experiments with triplicate biological replicates for each line.
