# Supplementary material for: MicroRNA 483-3p targets Pard3 to potentiate TGF-β1-induced cell migration, invasion, and epithelial–mesenchymal transition in anaplastic thyroid cancer cells
Source: PubMed Central journal article supplement (PMC6756112; doi:10.1038/s41388-018-0447-1), 2018-08-31
Supplement: 41388_2018_447_MOESM5_ESM.pdf [file 41388_2018_447_MOESM5_ESM.pdf]

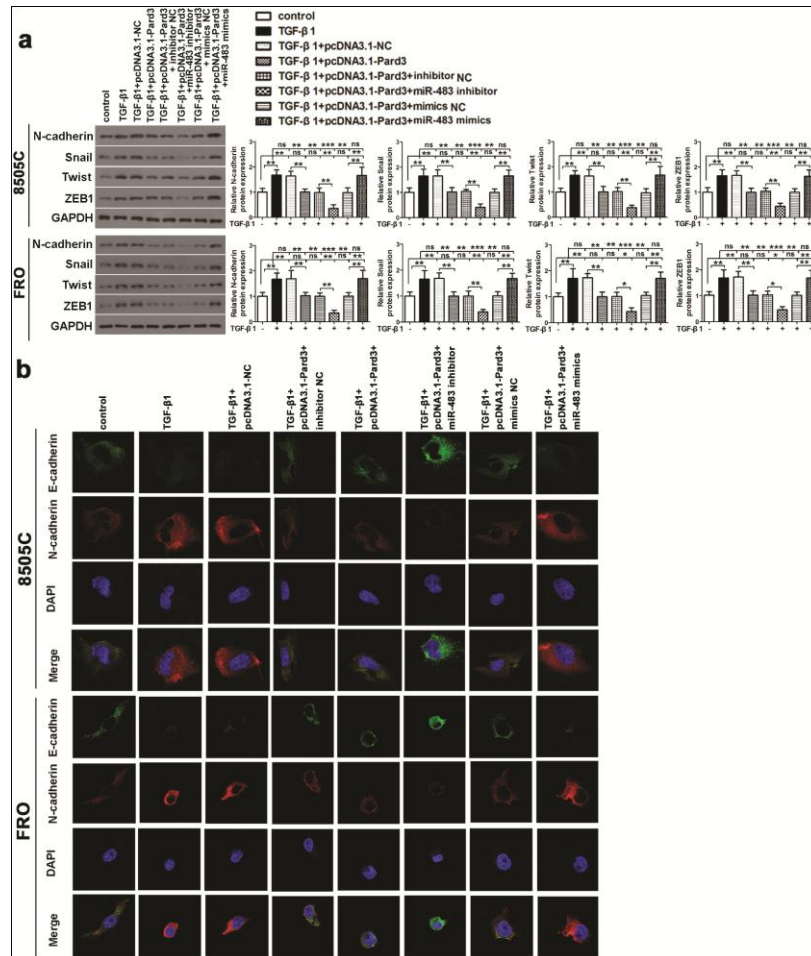

**Supplementary Figure 5.** MiR-483 promotes TGF- $\beta$ 1-induced EMT by downregulating Pard3 in ATC cells. 8505C and FRO cells stably transfected with pcDNA3.1-NC or pcDNA3.1-Pard3 were transfected with miR-483 inhibitor/miR-483 inhibitor NC or miR-483 mimics/miR-483 mimics NC and subsequently treated with TGF- $\beta$ 1 (10 ng/ml) for 48 h. Untransfected cells with or without TGF- $\beta$ 1 treatment were also included. (a) N-cadherin, Snail, Twist and ZEB1 expression were detected by western blotting. GAPDH was used as a loading control (\*\* $p < 0.01$ , \*\*\* $p < 0.001$ , one-way ANOVA, ns= non-significant). (b) E-cadherin and N-cadherin expression in 8505C and FRO cells were detected by immunofluorescence. N = 3 independent experiments with triplicate biological replicates for each line.
