# Supplementary material for: MicroRNA 483-3p targets Pard3 to potentiate TGF-β1-induced cell migration, invasion, and epithelial–mesenchymal transition in anaplastic thyroid cancer cells
Source: PubMed Central journal article supplement (PMC6756112; doi:10.1038/s41388-018-0447-1), 2018-08-31
Supplement: 41388_2018_447_MOESM8_ESM.pdf [file 41388_2018_447_MOESM8_ESM.pdf]

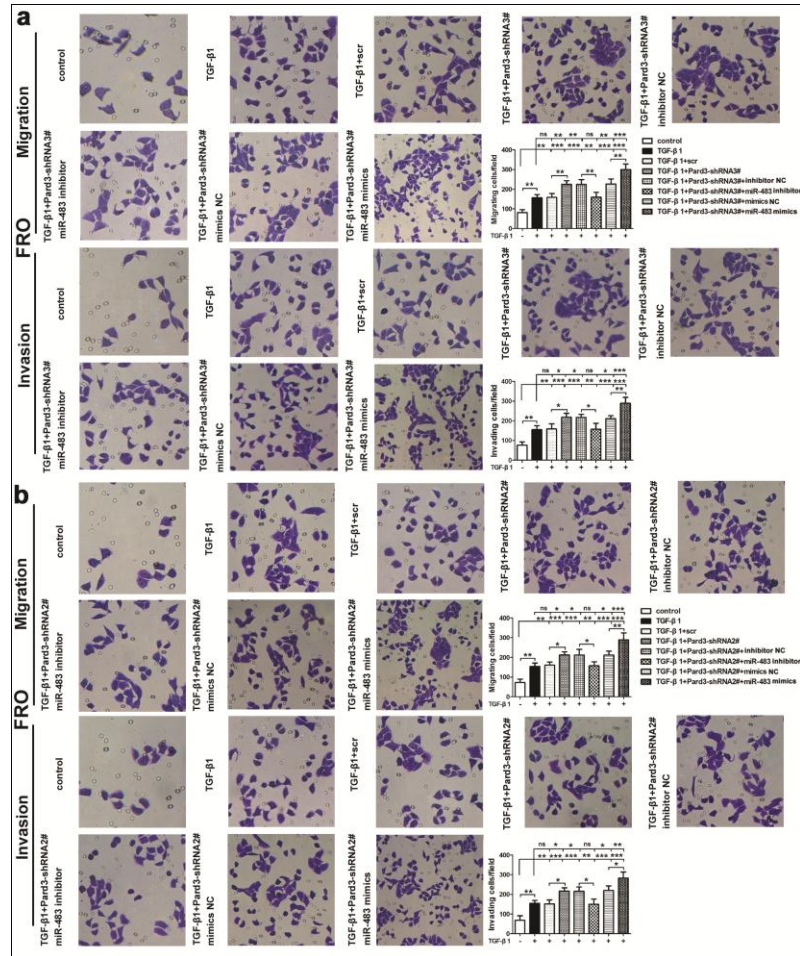

**Supplementary Figure 8.** Pard3 knockdown increases TGF-β1 induced FRO cells migration and invasion. FRO cells were transfected stably with Pard3-shRNA3# and 2#, miR-483 inhibitor/miR-483 inhibitor NC or miR-483 mimics/miR-483 mimics NC and subsequently treated with TGF-β1 (10 ng/ml) for 48 h. Untransfected cells with or without TGF-β1 treatment were also included. **(a, b)** FRO cell migration and invasion were measured by transwell assays (\* $p < 0.05$ , \*\* $p < 0.01$ , \*\*\* $p < 0.001$ , one-way ANOVA, ns=non-significant). N = 3 independent experiments with triplicate biological replicates for each line.
